# Supplementary material
Source: PubMed Central journal article supplement (PMC2040892)
Supplement: pnas_0701837104_10.pdf [file pnas_0701837104_10.pdf]

**Table 1. List of candidate oscillator genes in microarray analysis**

| Gene ID      | Genbank No. | Common Name | Time=0 | Time=0.5 | Time=1 | Time=1.5 | Time=2 | Time=2.5 | Time=3 | Time=3.5 | Time=4 | Time=4.5 |
|--------------|-------------|-------------|--------|----------|--------|----------|--------|----------|--------|----------|--------|----------|
| 1455899_x_at | BB241535    | Socs3       | 1      | 1.514    | 2.625  | 1.776    | 1.533  | 2.006    | 2.762  | 1.81     | 1.568  | 2.144    |
|              |             |             | 1      | 1.229    | 1.502  | 0.962    | 0.801  | 0.99     | 1.365  | 1.029    | 1.029  | 0.856    |
|              |             |             | 1      | 1.282    | 2.464  | 1.414    | 1.352  | 1.725    | 1.577  | 1.663    | 1.236  | 0.817    |
| 1418102_at   | BC018375    | Hes1        | 1      | 3.188    | 7.274  | 5.004    | 2.133  | 2.985    | 4.065  | 2.318    | 1.959  | 1.822    |
|              |             |             | 1      | 3.13     | 9.698  | 8.421    | 3.516  | 3.741    | 5.143  | 4.175    | 3.138  | 2.955    |
|              |             |             | 1      | 2.639    | 6.269  | 3.804    | 2.555  | 2.599    | 3.091  | 2.312    | 1.426  | 0.967    |
| 1429653_at   | BE863648    | Gse1        | 1      | 0.922    | 0.735  | 2.046    | 2.163  | 1.257    | 3.027  | 2.148    | 1.415  | 1.44     |
|              |             |             | 1      | 1.111    | 1.497  | 3.859    | 3.135  | 2.85     | 5.004  | 4.125    | 2.252  | 1.523    |
|              |             |             | 1      | 3.028    | 4.481  | 5.875    | 6.01   | 5.487    | 12.35  | 8.537    | 4.936  | 3.39     |
| 1422771_at   | AF010133    | Smad6       | 1      | 1.103    | 1.052  | 3.006    | 3.192  | 1.911    | 1.961  | 1.735    | 2.624  | 2.568    |
|              |             |             | 1      | 0.933    | 1.272  | 3.606    | 3.71   | 1.976    | 1.764  | 2.587    | 2.736  | 2.224    |
|              |             |             | 1      | 1.203    | 1.548  | 3.559    | 4.491  | 2.353    | 2.493  | 2.988    | 3.217  | 2.278    |
| 1439264_x_at | BB433798    | Lasp1       | 1      | 1.502    | 0.814  | 1.52     | 1.522  | 0.921    | 1.029  | 1.399    | 1.99   | 0.556    |
|              |             |             | 1      | 1.151    | 1.178  | 1.784    | 2.437  | 3.045    | 1.495  | 2.591    | 1.968  | 1.751    |
|              |             |             | 1      | 0.843    | 1.193  | 1.332    | 2.027  | 2.354    | 1.92   | 1.565    | 2.423  | 2.845    |
| 1452713_a_at | AK002371    | Wdr57       | 1      | 1.196    | 0.714  | 1.222    | 1.334  | 1.282    | 0.672  | 2.089    | 1.947  | 1.239    |
|              |             |             | 1      | 1.006    | 1.156  | 1.343    | 2.008  | 2.172    | 1.25   | 2.388    | 1.814  | 1.374    |
|              |             |             | 1      | 1.31     | 1.262  | 1.385    | 1.798  | 2.677    | 2.23   | 1.688    | 3.028  | 2.964    |
| 1434071_a_at | AV288264    | Pelo        | 1      | 0.822    | 0.941  | 1.249    | 1.627  | 2.75     | 2      | 1.67     | 3.135  | 2.666    |
|              |             |             | 1      | 1.102    | 0.715  | 0.866    | 1.578  | 1.688    | 1.25   | 1.125    | 2.013  | 1.885    |
|              |             |             | 1      | 1.491    | 0.87   | 1.317    | 1.74   | 1.999    | 1.511  | 2.045    | 2.33   | 2.571    |

Signal intensity at each time point was normalized to that of time = 0. Data from three independent experiments are shown.
