# Supplementary material
Source: PubMed Central journal article supplement (PMC2040892)

**A**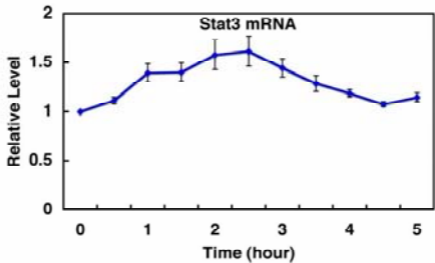**B**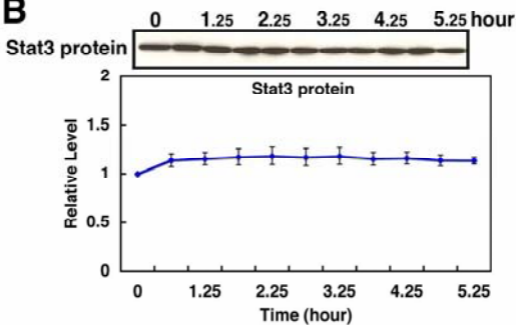**C**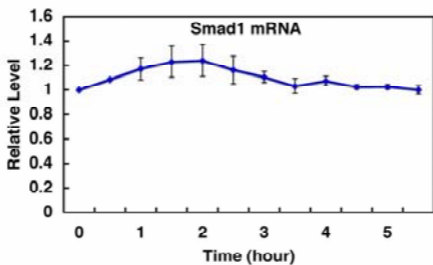**D**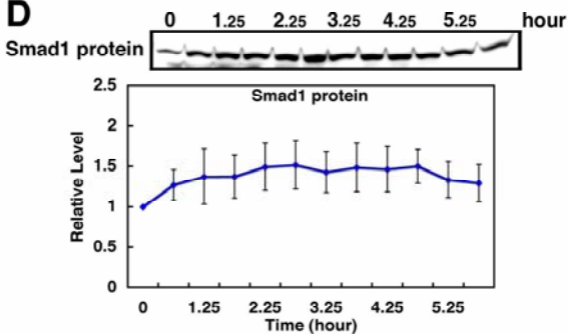

Supplement: pnas_0701837104_1.pdf [file pnas_0701837104_1.pdf]

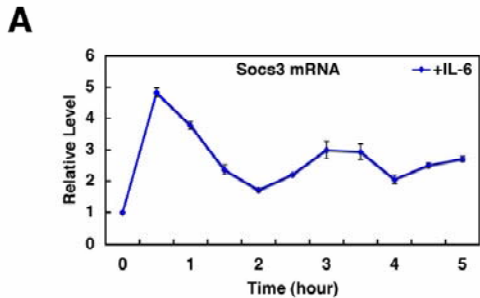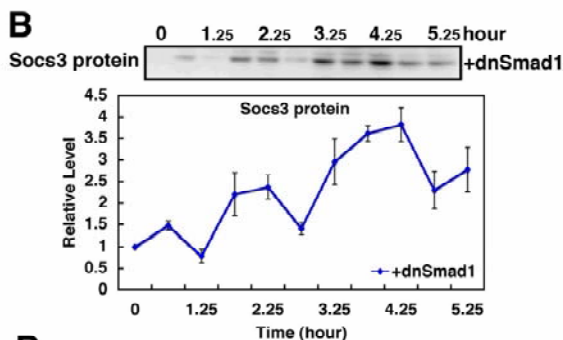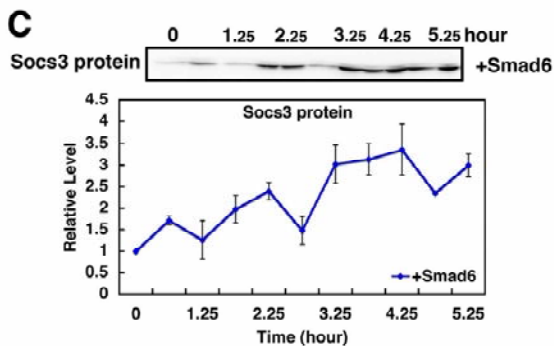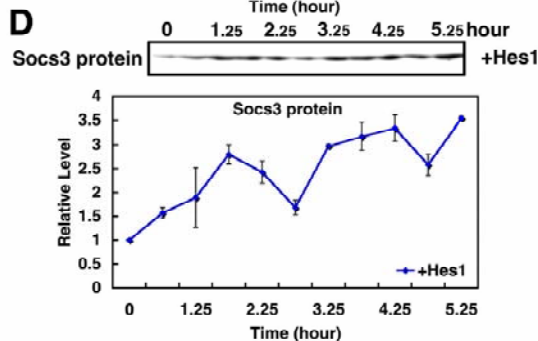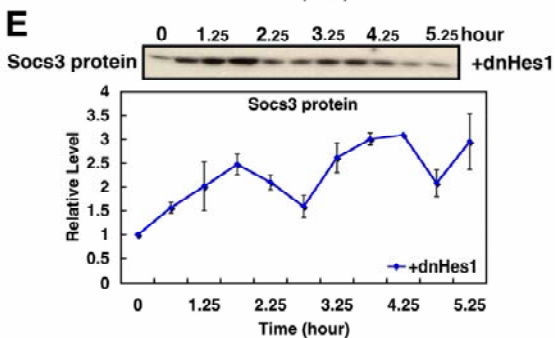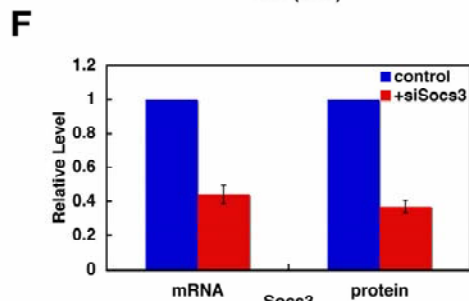

Supplement: pnas_0701837104_2.pdf [file pnas_0701837104_2.pdf]

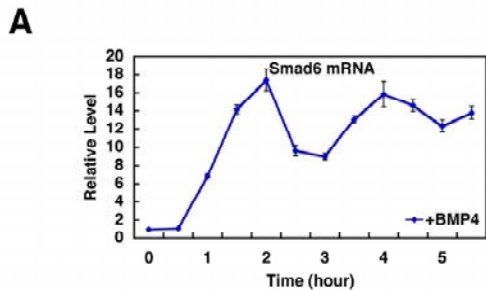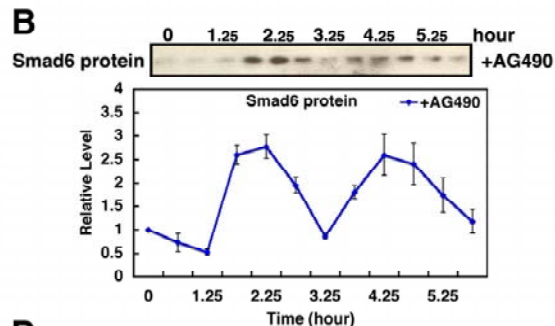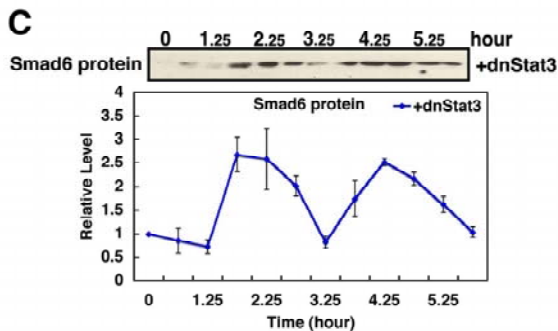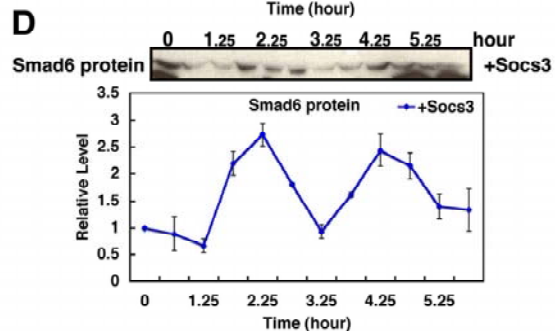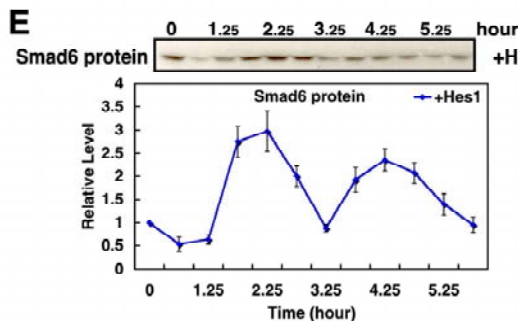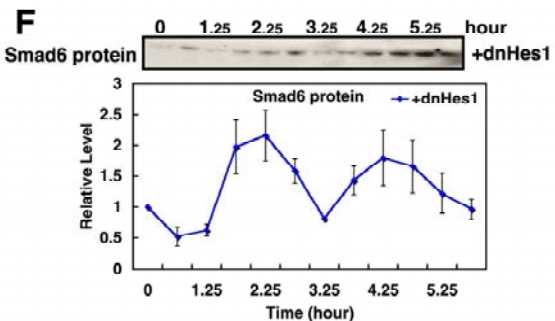

Supplement: pnas_0701837104_3.pdf [file pnas_0701837104_3.pdf]

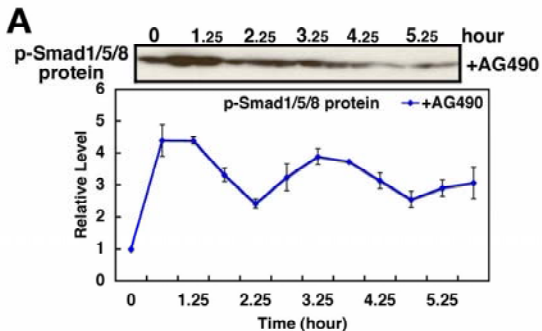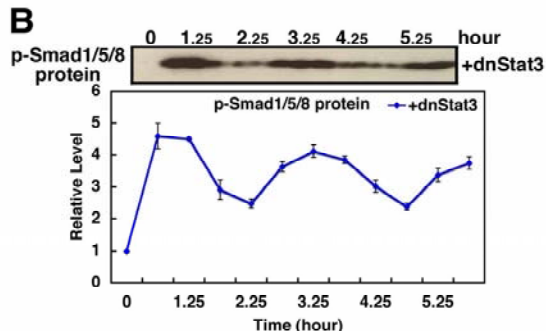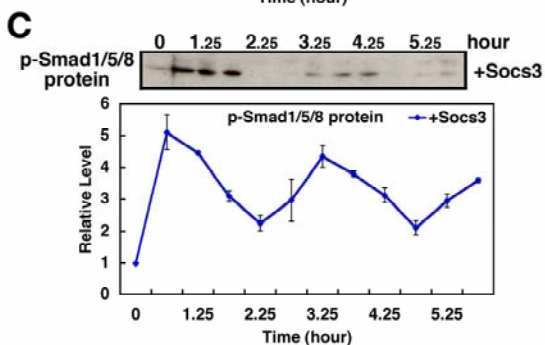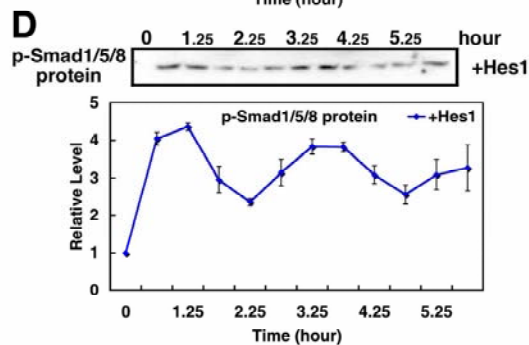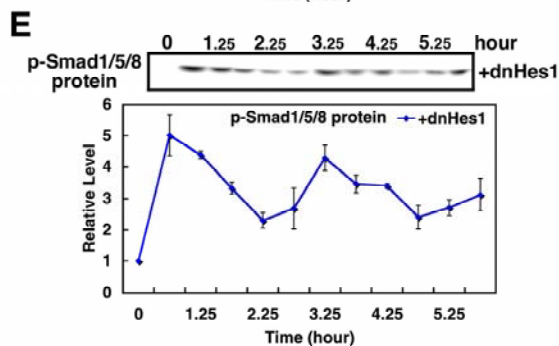

Supplement: pnas_0701837104_4.pdf [file pnas_0701837104_4.pdf]

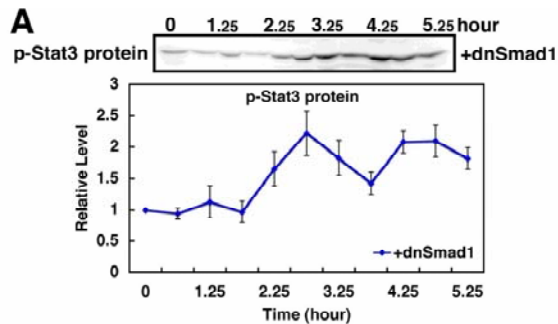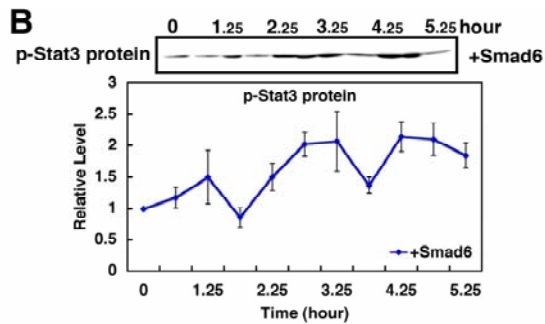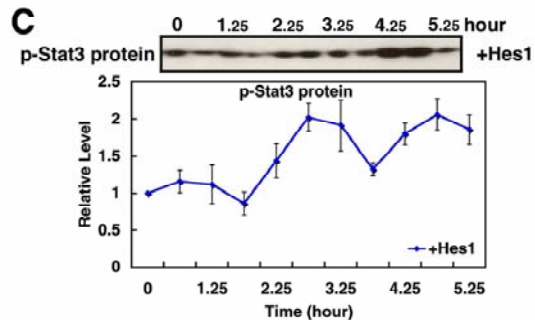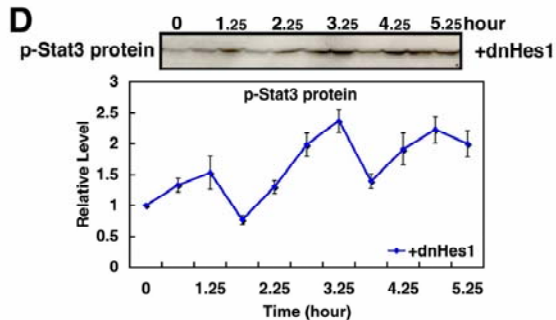

Supplement: pnas_0701837104_5.pdf [file pnas_0701837104_5.pdf]

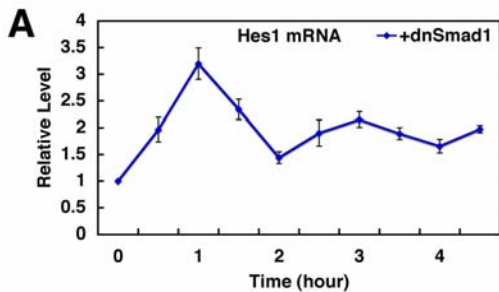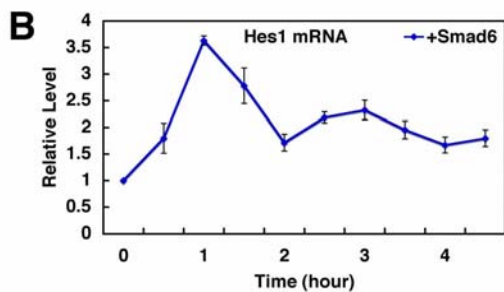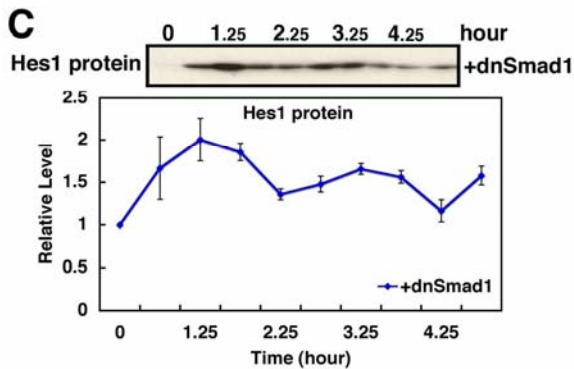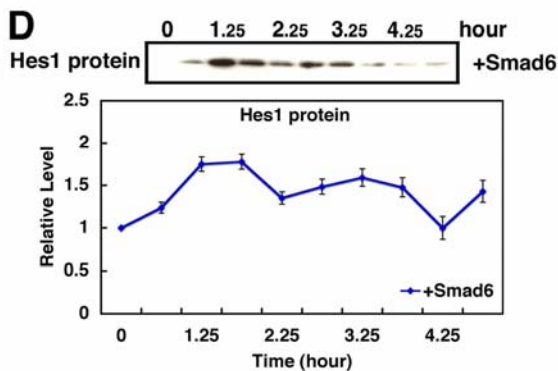

Supplement: pnas_0701837104_6.pdf [file pnas_0701837104_6.pdf]

**A**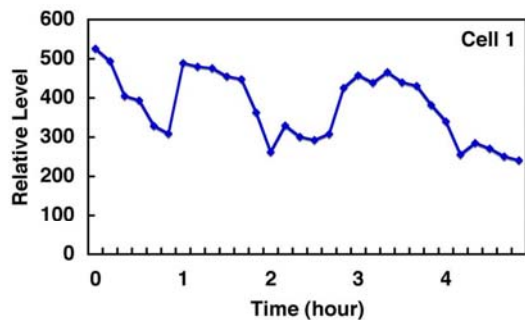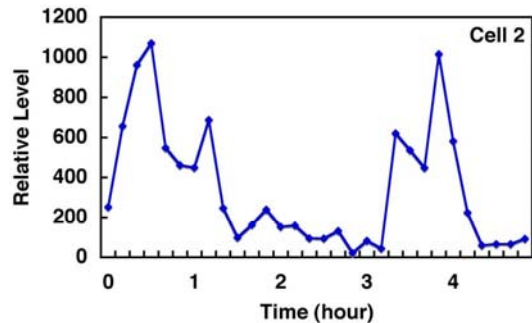**B**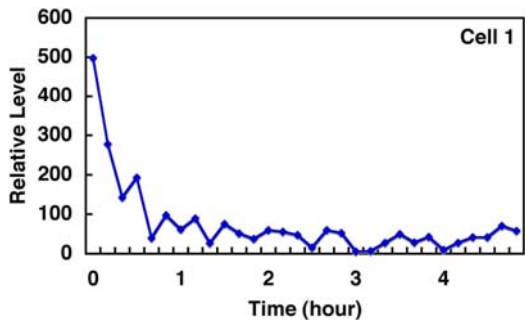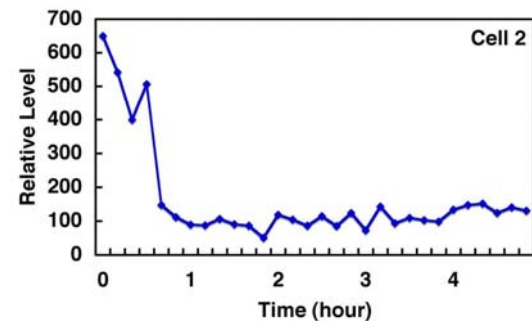

Supplement: pnas_0701837104_7.pdf [file pnas_0701837104_7.pdf]

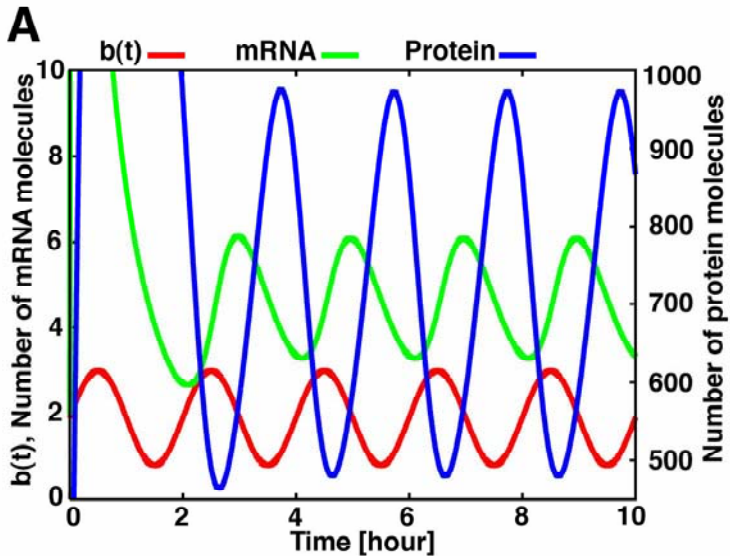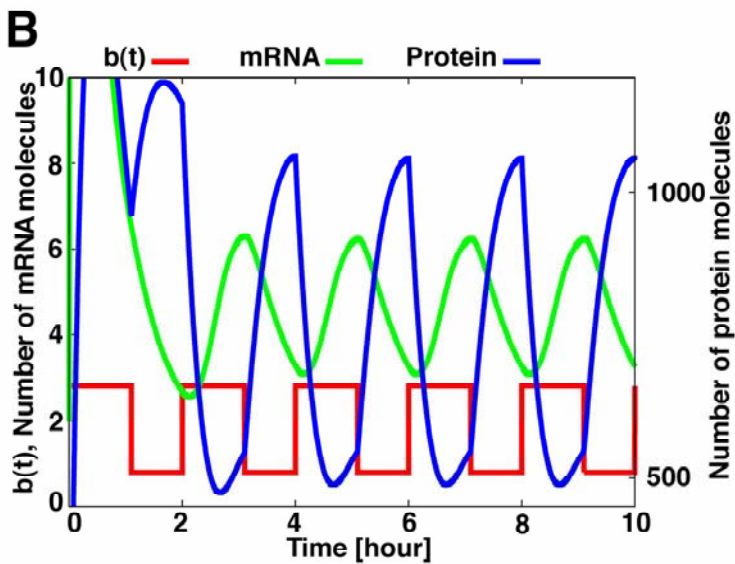

Supplement: pnas_0701837104_8.pdf [file pnas_0701837104_8.pdf]

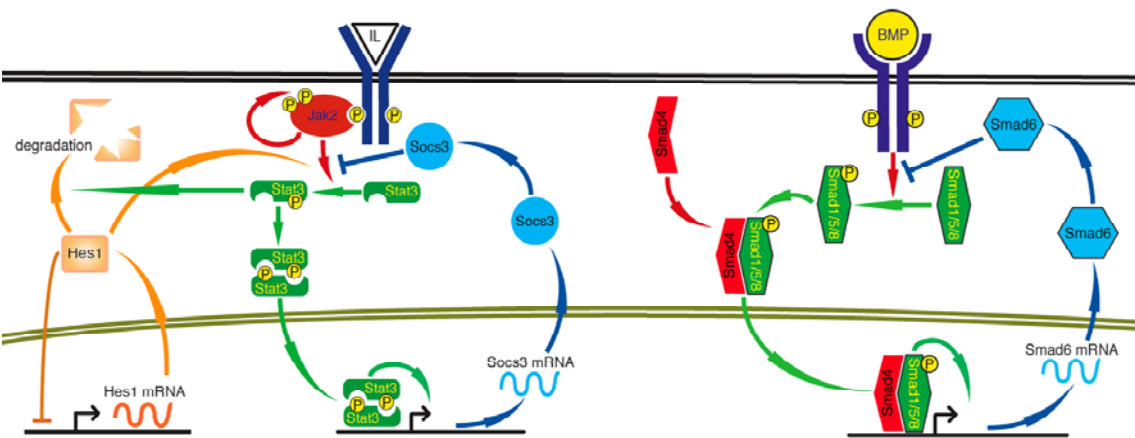

Supplement: pnas_0701837104_9.pdf [file pnas_0701837104_9.pdf]
